# Supplementary material
Source: PubMed Central journal article supplement (PMC8897247)
Supplement: NIHMS1774356-supplement-8.pdf [file NIHMS1774356-supplement-8.pdf]

## Mucosal fungi promote gut barrier function and social behavior via type 17 immunity

### Authors:

Irina Leonardi<sup>1,2</sup>, Iris H. Gao<sup>1,2,7#</sup>, Woan-Yu Lin<sup>1,2,7#</sup>, Megan Allen<sup>4</sup>, Xin V. Li<sup>1,2</sup>, William D. Fiers<sup>1,2</sup>, Meghan Bialt De Celie<sup>1,2</sup>, Gregory G. Putzel<sup>2</sup>, Rhonda K. Yantiss<sup>5</sup>, Melanie Johncilla<sup>5</sup>, Dilek Colak<sup>4,6</sup>, Iliyan D. Iliev<sup>1,2,3,7\*</sup>

### Supplementary Tables

**Sup Table 1. Related to Figure 1. Metadata for human subjects' samples.**

| ID | Sample Type       | Sex | Age | BioProjectID |
|----|-------------------|-----|-----|--------------|
| 1  | Intestinal Mucosa | F   | 49  | PRJNA594055  |
| 2  | Intestinal Mucosa | F   | 42  | PRJNA594055  |
| 3  | Intestinal Mucosa | F   | 41  | PRJNA594055  |
| 4  | Intestinal Mucosa | F   | 22  | PRJNA594055  |
| 5  | Intestinal Mucosa | F   | 29  | PRJNA594055  |
| 6  | Intestinal Mucosa | F   | 51  | PRJNA594055  |
| 6  | Intestinal Mucosa | F   | 63  | PRJNA594055  |

**Sup Table 2. Related to Figure 2. RNA quality**

| ID | Group   | Conc [ng/ul] | 260/280 | RIN |
|----|---------|--------------|---------|-----|
| 1  | ASF     | 298.9        | 2.05    | 9.5 |
| 2  | ASF     | 168.2        | 2.07    | 9.8 |
| 3  | ASF     | 181.2        | 1.96    | 10  |
| 4  | ASF     | 131          | 2.02    | 10  |
| 5  | ASF+MUC | 361.3        | 1.99    | 8.8 |
| 6  | ASF+MUC | 49.3         | 1.77    | 9.8 |
| 7  | ASF+MUC | 372.5        | 2.03    | 9   |
| 8  | ASF+MUC | 144.7        | 1.9     | 10  |
